# Supplementary material
Source: PubMed Central journal article supplement (PMC4022647)
Supplement: nl500390f_si_001.pdf [file nl500390f_si_001.pdf]

**Supporting information for:**  
**Atomistic origins of high-performance in hybrid**  
**halide perovskite solar cells**

Jarvist M. Frost,<sup>†</sup> Keith T. Butler,<sup>†</sup> Federico Brivio,<sup>†</sup> Christopher H. Hendon,<sup>†</sup> Mark  
van Schilfgaarde,<sup>‡</sup> and Aron Walsh<sup>\*,†</sup>

*Centre for Sustainable Chemical Technologies and Department of Chemistry, University of  
Bath, Claverton Down, Bath BA2 7AY, UK, and Department of Physics, Kings College  
London, London WC2R 2LS, UK*

E-mail: a.walsh@bath.ac.uk

A dataset comprised of GAUSSIAN input and output files used in this work are electronically available as a figshare dataset <http://dx.doi.org/10.6084/m9.figshare.915406>.<sup>S1</sup>

The files comprise of geometry optimisations of methylammonia [MA] (including fluorinated analogues [MA-1F, MA-2F, MA-3F]), ammonia [NH<sub>4</sub>] and formamidinium [forma]. Structures were relaxed at B3LYP/6-31G\*, and the polarisation tensor was calculated at B3LYP/6-31G\* and CCSD/CC-PVQZ. A PCM prefix to the filename indicates that the calculation (geometry relaxation and single point) was carried out with the polarizable continuum model (PCM) with Ethanol as the solvent.

---

<sup>\*</sup>To whom correspondence should be addressed

<sup>†</sup>Centre for Sustainable Chemical Technologies and Department of Chemistry, University of Bath, Claverton Down, Bath BA2 7AY, UK

<sup>‡</sup>Department of Physics, Kings College London, London WC2R 2LS, UK

## References

(S1) Figshare data set. <http://dx.doi.org/10.6084/m9.figshare.915406>.
